# Supplementary material for: Unraveling the Heterogeneity of Sarcoma Survivors’ Health-Related Quality of Life Regarding Primary Sarcoma Location: Results from the SURVSARC Study
Source: Cancers (Basel). 2020 Oct 22;12(11):3083. doi: 10.3390/cancers12113083 (PMC7690571; doi:10.3390/cancers12113083)
Supplement: Supplementary file 1 [file cancers-12-03083-s001.pdf]

Article

# Unravelling the Heterogeneity of Sarcoma Survivors' Health-Related Quality of Life Regarding Primary Sarcoma Location: Results from the SURVSARC Study

Ilse van Eck, Dide den Hollander, Ingrid M.E. Desar, Vicky L.M.N. Soomers, Michiel A.J. van de Sande, Jacco J. de Haan, Cornelis Verhoef, Ingeborg J.H. Vriens, Johannes J. Bonenkamp, Winette T.A. van der Graaf, Winan J. van Houdt and Olga Husson

## Supplementary Materials

### Text S1: Overview of the specific Sarcomas per Location Category

#### Category 1: Head & Neck

- C05.1 Soft palate.
- C07.0 Malignant neoplasm of parotid gland.
- C08.0 Submandibular gland.
- C30.0 Nasal cavity.
- C31.1 Ethmoidal sinus.
- C31.8 Overlapping lesion of accessory sinuses.
- C32.3 Laryngeal Cartilage
- C41.0 Bones of skull and face
- C41.1 Mandible
- C49.0 Connective and soft tissue of head, face and neck
- C69.6 Orbit, unspecified
- C76.0 Nose, unspecified

#### Category 2: Chest

- C34.1 Upper lobe, bronchus or lung
- C34.3 Lower Lobe, bronchus or lung
- C34.9 Bronchus or lung, unspecified
- C38.2 Posterior mediastinum
- C38.3 Mediastinum, part unspecified
- C41.3 Ribs, sternum and clavicle
- C49.3 Connective and soft tissue of thorax
- C49.6 Connective and soft tissue of trunk, unspecified

#### Category 3: Abdominal including retroperitoneal

- C16.3 Stomach + pyloric antrum
- C22.0 Liver
- C48.0 Retroperitoneum
- C48.1 Specified parts of peritoneum
- C49.4 Connective and soft tissue of abdomen
- C64.0 Kidney, unspecified

- C66.0 Ureter

#### Category 4: Pelvis including urogenital organs

- C20.0 Rectum, unspecified
- C51.0 Labium majus
- C51.9 Vulva, unspecified
- C53.9 Cervix uteri, unspecified
- C54.1 Corpus Uteri: Endometrium
- C54.2 Corpus Uteri: Myometrium
- C54.9 Corpus uteri, unspecified
- C56.0 Ovary
- C63.1 Spermatic cord
- C63.2 Scrotum
- C63.7 Other specified male genital organs: Seminal vesicle, Tunica vaginalis
- C67.9 Bladder, unspecified

#### Category 5: Axial Skeleton

- C41.2 Vertebral column
- C41.4 Pelvic bones, sacrum and coccyx

#### Category 6: Upper extremities

- C40.0 Scapula and long bones of upper limb
- C40.1 Short bones of upper limb
- C49.1 Connective and soft tissue of upper limb, including shoulder

#### Category 7: Lower extremities

- C40.2 Long bones of lower limb
- C40.3 Short bones of lower limb
- C49.2 Connective and soft tissue of lower limb, including hip

#### Category 8: Breast

- C50.1 Central portion of breast
- C50.2 Upper-inner quadrant of breast
- C50.3 Lower-inner quadrant of breast
- C50.4 Upper-outer quadrant of breast
- C50.5 Lower-outer quadrant of breast
- C50.6 Axillary tail of breast
- C50.8 Overlapping lesion of breast
- C50.9 Breast, unspecified

#### Category 9: Skin

- C44.1 Skin of eyelid, including canthus
- C44.3 Skin of other and unspecified parts of face
- C44.4 Skin of scalp and neck
- C44.5 Skin of trunk
- C44.6 Skin of upper limb, including shoulder
- C44.7 Skin of lower limb, including hip

#### Category 10: Other:

- C47.0 Peripheral nerves of head, face and neck

- C47.1 Peripheral nerves of upper limb, including shoulder
- C47.2 Peripheral nerves of lower limb, including hip
- C47.3 Peripheral nerves of thorax
- C47.4 Peripheral nerves of abdomen
- C47.5 Peripheral nerves of pelvis
- C47.6 Peripheral nerves of trunk, unspecified
- C49.5 Connective and soft tissue of pelvis
- C49.9 Connective and soft tissue, unspecified
- C70.0 Cerebral meninges
- C80.9 Malignant neoplasm, primary site unspecified

**Table S1.** Results of Post-hoc analyses and multivariate analyses with skin, head & neck and abdominal including retroperitoneal sarcomas as reference group.

|                                 | One-way ANOVA with<br>Post Hoc Bonferroni |        |      | Adjusted - Multi-variate linear regression |        |      |                                    |
|---------------------------------|-------------------------------------------|--------|------|--------------------------------------------|--------|------|------------------------------------|
|                                 | MD                                        | 95% CI |      | MD                                         | 95% CI |      | Clinical<br>relevance <sup>1</sup> |
| Global health status            |                                           |        |      |                                            |        |      |                                    |
| <i>Compared to skin</i>         |                                           |        |      |                                            |        |      |                                    |
| Head & Neck                     | -11.2                                     | -20.3  | -2.1 | -8.5 <sup>a</sup>                          | -14.4  | -2.3 | Small                              |
| Abd. + R.P.*                    | -8.9                                      | -16.9  | -0.9 | -4.9 <sup>a</sup>                          | -9.7   | -0.1 | Small                              |
| Physical functioning            |                                           |        |      |                                            |        |      |                                    |
| <i>Compared to skin</i>         |                                           |        |      |                                            |        |      |                                    |
| Abd. + R.P.*                    | -10.6                                     | -19.7  | -1.5 | -4.3                                       | -9.6   | 0.9  | N.A.                               |
| Lower extremities               | -11.5                                     | -18.6  | -4.3 | -5.5 <sup>a</sup>                          | -9.9   | -1.2 | Small                              |
| Other locations                 | -12.6                                     | -22.3  | -2.9 | -9.2 <sup>a</sup>                          | -14.8  | -3.6 | Small                              |
| Role functioning                |                                           |        |      |                                            |        |      |                                    |
| <i>Compared to skin</i>         |                                           |        |      |                                            |        |      |                                    |
| Other locations                 | -15.7                                     | -28.3  | -3.0 | -11.0 <sup>a</sup>                         | -18.7  | -3.4 | Small                              |
| Cognitive functioning           |                                           |        |      |                                            |        |      |                                    |
| <i>Compared to H&amp;N**</i>    |                                           |        |      |                                            |        |      |                                    |
| Upper extremities               | 10.2                                      | 0.1    | 20.2 | 8.0 <sup>b</sup>                           | 2.0    | 14.0 | Small                              |
| Lower extremities               | 10.7                                      | 2.1    | 19.3 | 7.7 <sup>b</sup>                           | 2.6    | 12.9 | Small                              |
| Fatigue                         |                                           |        |      |                                            |        |      |                                    |
| <i>Compared to Skin</i>         |                                           |        |      |                                            |        |      |                                    |
| Head & Neck                     | 13.2                                      | 1.3    | 25.2 | 4.8 <sup>a</sup>                           | -2.9   | 12.4 | N.A.                               |
| Abd. + R.P.*                    | 12.5                                      | 2.0    | 23.1 | 5.9 <sup>a</sup>                           | -0.4   | 12.1 | N.A.                               |
| Breast                          | 17.9                                      | 0.05   | 35.7 | 13.0 <sup>a</sup>                          | 2.3    | 23.6 | Small                              |
| Other locations                 | 14.6                                      | 3.3    | 25.8 | 9.4 <sup>a</sup>                           | 2.6    | 16.1 | Small                              |
| Nausea/vomiting                 |                                           |        |      |                                            |        |      |                                    |
| <i>Compared to Abd. + R.P.*</i> |                                           |        |      |                                            |        |      |                                    |
| Chest                           | -4.5                                      | -8.6   | -0.3 | -4.1 <sup>c</sup>                          | -6.7   | -1.5 | Small                              |
| Upper extremities               | -4.4                                      | -8.4   | -0.4 | -3.9 <sup>c</sup>                          | -6.4   | -1.4 | Small                              |
| Lower extremities               | -4.0                                      | -7.2   | -0.8 | -3.4 <sup>c</sup>                          | -5.4   | -1.3 | Small                              |
| Appetite Loss                   |                                           |        |      |                                            |        |      |                                    |
| <i>Compared to Abd. + R.P.*</i> |                                           |        |      |                                            |        |      |                                    |
| Lower extremities               | -6.5                                      | -12.4  | -0.7 | -5.4 <sup>c</sup>                          | -9.1   | -1.8 | Small                              |
| Constipation                    |                                           |        |      |                                            |        |      |                                    |
| <i>Compared to Abd. + R.P.*</i> |                                           |        |      |                                            |        |      |                                    |
| Skin                            | -10.6                                     | -19.3  | -1.8 | -7.0 <sup>c</sup>                          | -12.3  | -1.6 | Small                              |
| Diarrhoea                       |                                           |        |      |                                            |        |      |                                    |
| <i>Compared to Abd. + R.P.*</i> |                                           |        |      |                                            |        |      |                                    |
| Chest                           | -7.9                                      | -14.9  | -1.0 | -7.5 <sup>c</sup>                          | -11.8  | -3.2 | Medium                             |

|                   |      |       |      |                   |      |      |       |
|-------------------|------|-------|------|-------------------|------|------|-------|
| Lower extremities | −6.5 | −11.9 | −1.1 | −5.4 <sup>c</sup> | −8.8 | −2.0 | Small |
| Skin              | −7.9 | −14.7 | −1.1 | −5.6 <sup>c</sup> | −9.8 | −1.4 | Small |

Only locations with significant differences in the one-way ANOVA were used as reference groups in the multivariable linear regression. <sup>1</sup> Clinical relevance is only mentioned for the locations that were significant in the One-way ANOVA and remained significant after adjustment for confounders in the multivariate analyses [26]. N.A. = Not Applicable; \* Abd. + R.P. = abdominal including retroperitoneal; \*\* H&N = Head & Neck. <sup>a</sup> Skin sarcomas as reference group; <sup>b</sup> Head & Neck sarcomas as reference group; <sup>c</sup> Abdominal including retroperitoneal sarcomas as reference group.

**Table S2.** Treatment specific HRQoL issues after surgery of the upper extremities.

| N = 116                                    | Difficult<br>Total<br>N (%) | Difficult<br>for<br>amputation<br>N (%) | Difficult for<br>no<br>amputation<br>N (%) | Not<br>difficult<br>N (%) | Not<br>applicable<br>N (%) | Missings<br>N (%) |
|--------------------------------------------|-----------------------------|-----------------------------------------|--------------------------------------------|---------------------------|----------------------------|-------------------|
| Putting on a pair of trousers              | 15 (13)                     | 7/17 (41)                               | 8/65 (12)                                  | 59 (51)                   | 7 (6)                      | 35 (30)           |
| Tying shoe laces                           | 23 (20)                     | 12/17 (71)                              | 11/65 (17)                                 | 51 (44)                   | 7 (6)                      | 35 (30)           |
| Putting on a pair of socks/stockings       | 14 (12)                     | 7/17 (41)                               | 7/65 (11)                                  | 60 (52)                   | 7 (6)                      | 35 (30)           |
| Showering                                  | 14 (12)                     | 5/17 (29)                               | 9/65 (14)                                  | 61 (53)                   | 6 (5)                      | 35 (30)           |
| Dressing the arms and upper body           | 22 (19)                     | 6/17 (35)                               | 16/65 (25)                                 | 54 (47)                   | 5 (4)                      | 35 (30)           |
| Buttoning a shirt                          | 26 (23)                     | 12/17 (71)                              | 14/65 (22)                                 | 49 (42)                   | 6 (5)                      | 35 (30)           |
| Tying a tie/bow at the neck of a blouse    | 19 (16)                     | 9/17 (53)                               | 10/65 (15)                                 | 46 (40)                   | 16 (14)                    | 35 (30)           |
| Putting on make-up or shaving              | 17 (15)                     | 4/17 (24)                               | 13/65 (20)                                 | 58 (50)                   | 6 (5)                      | 35 (30)           |
| Brushing teeth                             | 10 (9)                      | 4/17 (24)                               | 6/65 (9)                                   | 64 (55)                   | 6 (5)                      | 36 (31)           |
| Brushing hair                              | 13 (11)                     | 2/17 (12)                               | 11/65 (17)                                 | 60 (52)                   | 8 (7)                      | 35 (30)           |
| Performing light household chores          | 22 (19)                     | 8/17 (47)                               | 14/65 (22)                                 | 50 (43)                   | 9 (8)                      | 35 (30)           |
| Gardening                                  | 37 (32)                     | 13/17 (76)                              | 24/65 (37)                                 | 27 (23)                   | 16 (14)                    | 36 (31)           |
| Preparing and serving meals                | 26 (22)                     | 12/17 (71)                              | 14/65 (22)                                 | 46 (40)                   | 9 (8)                      | 35 (30)           |
| Cutting food while eating                  | 27 (23)                     | 14/17 (82)                              | 13/65 (20)                                 | 47 (41)                   | 6 (5)                      | 36 (31)           |
| Drinking from a glass                      | 8 (7)                       | 3/17 (18)                               | 5/65 (8)                                   | 65 (56)                   | 7 (6)                      | 36 (31)           |
| Performing heavy household chores          | 46 (39)                     | 14/17 (82)                              | 32/65 (49)                                 | 24 (21)                   | 10 (9)                     | 36 (31)           |
| Going shopping                             | 21 (18)                     | 9/17 (53)                               | 12/65 (18)                                 | 51 (44)                   | 8 (7)                      | 36 (31)           |
| Giving or receiving change (coins/notes)   | 25 (22)                     | 11/17 (65)                              | 14/65 (22)                                 | 49 (42)                   | 6 (5)                      | 36 (31)           |
| Carrying a shopping bag or briefcase       | 33 (28)                     | 11/17 (65)                              | 22/65 (34)                                 | 40 (35)                   | 7 (6)                      | 36 (31)           |
| Lifting a box to an overhead shelf         | 43 (37)                     | 14/17 (82)                              | 29/65 (45)                                 | 32 (28)                   | 5 (4)                      | 36 (31)           |
| Turning a key in lock                      | 11 (10)                     | 5/17 (29)                               | 6/65 (9)                                   | 63 (54)                   | 6 (5)                      | 36 (31)           |
| Pushing or pulling open a door             | 17 (15)                     | 4/17 (24)                               | 13/65 (20)                                 | 56 (48)                   | 7 (6)                      | 36 (31)           |
| Writing                                    | 18 (15)                     | 10/17 (59)                              | 8/65 (12)                                  | 54 (47)                   | 8 (7)                      | 36 (31)           |
| Picking up small items                     | 17 (15)                     | 7/17 (41)                               | 10/65 (15)                                 | 58 (50)                   | 5 (4)                      | 36 (31)           |
| Completing usual duties at work/at home    | 31 (27)                     | 12/17 (71)                              | 19/65 (29)                                 | 42 (36)                   | 7 (6)                      | 36 (31)           |
| Working usual number of hours              | 21 (18)                     | 7/17 (41)                               | 14/65 (22)                                 | 40 (35)                   | 19 (16)                    | 36 (31)           |
| Participating in usual leisure activities  | 30 (26)                     | 13/17 (76)                              | 17/65 (26)                                 | 39 (33)                   | 11 (10)                    | 36 (31)           |
| Socialising with friends and family        | 9 (8)                       | 4/17 (24)                               | 5/65 (8)                                   | 63 (54)                   | 8 (7)                      | 36 (31)           |
| Participating in usual sporting activities | 37 (32)                     | 14/17 (82)                              | 23/65 (35)                                 | 34 (29)                   | 9 (8)                      | 36 (31)           |

**Table S3.** Treatment specific HRQoL issues after surgery of the lower extremities.

| N = 405 | Difficult<br>Total<br>N (%) | Difficult<br>for<br>amputation<br>N (%) | Difficult for no<br>amputation<br>N (%) | Not<br>difficult<br>N (%) | Not<br>applicable<br>N (%) | Missings<br>N (%) |
|---------|-----------------------------|-----------------------------------------|-----------------------------------------|---------------------------|----------------------------|-------------------|
|---------|-----------------------------|-----------------------------------------|-----------------------------------------|---------------------------|----------------------------|-------------------|

|                                            |          |            |              |          |         |         |
|--------------------------------------------|----------|------------|--------------|----------|---------|---------|
| Putting on a pair of trousers              | 103 (25) | 19/37 (51) | 84/317 (26)  | 231 (57) | 14 (4)  | 57 (14) |
| Putting on shoes                           | 114 (28) | 21/37 (57) | 93/317 (29)  | 218 (53) | 14 (4)  | 59 (15) |
| Putting on a pair of socks of stockings    | 121 (30) | 19/37 (51) | 102/317 (32) | 214 (53) | 13 (3)  | 57 (14) |
| Showering                                  | 66 (16)  | 26/37 (70) | 40/317 (13)  | 266 (66) | 16 (4)  | 57 (14) |
| Performing light household chores          | 70 (18)  | 20/37 (54) | 50/317 (16)  | 252 (62) | 25 (6)  | 58 (14) |
| Gardening                                  | 150 (37) | 28/37 (76) | 122/317 (38) | 156 (39) | 42 (10) | 57 (14) |
| Preparing and serving meals                | 51 (13)  | 18/37 (49) | 33/317 (10)  | 267 (66) | 29 (7)  | 58 (14) |
| Going shopping                             | 123 (31) | 28/37 (76) | 95/317 (30)  | 207 (51) | 17 (4)  | 58 (14) |
| Performing heavy household chores          | 155 (39) | 29/37 (78) | 126/317 (40) | 170 (42) | 22 (5)  | 58 (14) |
| Getting in and out of the bath             | 88 (22)  | 19/37 (51) | 69/317 (22)  | 181 (44) | 73 (18) | 63 (16) |
| Getting out of bed                         | 77 (19)  | 15/37 (41) | 62/317 (20)  | 254 (62) | 14 (4)  | 60 (15) |
| Rising from a chair                        | 110 (27) | 18/37 (49) | 92/317 (29)  | 222 (54) | 14 (4)  | 59 (15) |
| Kneeling                                   | 228 (56) | 32/37 (86) | 196/317 (62) | 106 (26) | 11 (3)  | 60 (15) |
| Bending to pick something off the floor    | 150 (37) | 26/37 (70) | 124/317 (39) | 183 (45) | 12 (3)  | 60 (15) |
| Walking upstairs                           | 150 (37) | 25/37 (68) | 125/317 (39) | 182 (45) | 13 (3)  | 60 (15) |
| Walking downstairs                         | 138 (34) | 30/37 (81) | 108/317 (34) | 194 (48) | 13 (3)  | 60 (15) |
| Driving                                    | 53 (13)  | 11/37 (30) | 42/317 (13)  | 253 (62) | 39 (10) | 60 (15) |
| Walking within the house                   | 66 (16)  | 23/37 (62) | 43/317 (14)  | 266 (66) | 13 (3)  | 60 (15) |
| Walking outdoors                           | 125 (31) | 28/37 (76) | 97/317 (31)  | 206 (51) | 13 (3)  | 61 (15) |
| Sitting                                    | 43 (11)  | 11/37 (30) | 32/317 (10)  | 288 (71) | 13 (3)  | 61 (15) |
| Walking up or down hills or a ramp         | 186 (46) | 31/37 (84) | 155/317 (49) | 145 (36) | 13 (3)  | 61 (15) |
| Standing                                   | 59 (15)  | 17/37 (46) | 42/317 (13)  | 273 (67) | 13 (3)  | 60 (15) |
| Getting up from kneeling                   | 233 (57) | 29/37 (78) | 204/317 (64) | 96 (24)  | 16 (4)  | 60 (15) |
| Getting in and out of a car                | 138 (34) | 20/37 (54) | 118/317 (37) | 193 (48) | 13 (3)  | 61 (15) |
| Participating in sexual activities         | 91 (23)  | 22/37 (59) | 69/317 (22)  | 200 (49) | 52 (13) | 62 (15) |
| Completing usual duties at work/at home    | 129 (32) | 23/37 (62) | 106/317 (33) | 189 (46) | 28 (7)  | 59 (15) |
| Working usual number of hours              | 105 (26) | 20/37 (54) | 85/317 (27)  | 184 (45) | 57 (14) | 59 (15) |
| Participating in usual leisure activities  | 138 (34) | 29/37 (78) | 109/317 (34) | 190 (47) | 18 (4)  | 59 (15) |
| Socialising with friends and family        | 52 (13)  | 17/37 (46) | 35/317 (11)  | 277 (68) | 16 (4)  | 60 (15) |
| Participating in usual sporting activities | 183 (45) | 29/37 (78) | 154/317 (49) | 133 (33) | 29 (7)  | 60 (15) |

**Table S4.** Treatment specific HRQoL issues after surgery in the abdomen.

|                                                                                                 | <b>Present<br/>N (%)</b> | <b>Not present<br/>N (%)</b> | <b>Missings<br/>N (%)</b> |
|-------------------------------------------------------------------------------------------------|--------------------------|------------------------------|---------------------------|
| Answered by all abdominal including retroperitoneal sarcoma survivors N = 106                   |                          |                              |                           |
| Abdominal pain                                                                                  | 34 (32)                  | 56 (53)                      | 16 (15)                   |
| Bloated feeling in the abdomen                                                                  | 34 (32)                  | 55 (52)                      | 17 (16)                   |
| Problems with eating                                                                            | 15 (14)                  | 74 (70)                      | 17 (16)                   |
| Problems with drinking                                                                          | 7 (7)                    | 82 (77)                      | 17 (16)                   |
| Stomach complaints                                                                              | 20 (19)                  | 69 (65)                      | 17 (16)                   |
| Felt full up too quickly while eating                                                           | 23 (22)                  | 66 (62)                      | 17 (16)                   |
| Worries about weight                                                                            | 38 (36)                  | 52 (49)                      | 16 (15)                   |
| Answered by only abdominal including retroperitoneal sarcoma survivors without ostomy<br>N = 99 |                          |                              |                           |

|                                                                                             |         |         |         |
|---------------------------------------------------------------------------------------------|---------|---------|---------|
| Unintentional release of gas/flatulence                                                     | 38 (39) | 45 (45) | 16 (16) |
| Unintentional release of stool                                                              | 12 (12) | 72 (72) | 16 (16) |
| Embarrassed due to defecation pattern                                                       | 22 (22) | 61 (62) | 16 (16) |
| Answered by only abdominal including retroperitoneal sarcoma survivors with ostomy<br>N = 7 |         |         |         |
| Unintentional release of gas/flatulence from stoma bag                                      | 3 (43)  | 4 (57)  | 0 (0)   |
| Leakage of stools from stoma bag                                                            | 2 (29)  | 5 (71)  | 0 (0)   |
| Embarrassed because of the stoma                                                            | 3 (43)  | 4 (57)  | 0 (0)   |
| Problems caring for the stoma                                                               | 1 (14)  | 6 (86)  | 0 (0)   |

**Table S5.** Treatment specific HRQoL issues after surgery of the cervix, uterus or ovaries.

| N = 17                                 | Present<br>N (%) | Not present<br>N (%) | Not applicable<br>N (%) | Missings<br>N (%) |
|----------------------------------------|------------------|----------------------|-------------------------|-------------------|
| Pain in the back                       | 9 (53)           | 6 (35)               | 0 (0)                   | 2 (12)            |
| Hurry to toilet urine urge             | 7 (41)           | 8 (47)               | 0 (0)                   | 2 (12)            |
| Unintentional release of urine         | 6 (35)           | 9 (53)               | 0 (0)                   | 2 (12)            |
| Hurry toilet stool urge                | 3 (18)           | 12 (70)              | 0 (0)                   | 2 (12)            |
| Unintentional release of stool         | 0 (0)            | 15 (88)              | 0 (0)                   | 2 (12)            |
| Flatulence                             | 9 (53)           | 6 (35)               | 0 (0)                   | 2 (12)            |
| Abdominal cramps                       | 7 (41)           | 8 (47)               | 0 (0)                   | 2 (12)            |
| Bloated feeling in the abdomen         | 7 (41)           | 8 (47)               | 0 (0)                   | 2 (12)            |
| Worries about ability to have children | 0 (0)            | 3 (18)               | 12 (70)                 | 2 (12)            |
| Complaints similar to menopause        | 9 (53)           | 4 (23)               | 2 (12)                  | 2 (12)            |

**Table S6.** Treatment specific HRQoL issues after surgery in the head or neck area.

| N = 72                                             | Present<br>N (%) | Not present<br>N (%) | Missings<br>N (%) |
|----------------------------------------------------|------------------|----------------------|-------------------|
| Pain in operated area                              | 16 (22)          | 35 (49)              | 21 (29)           |
| Sensitive mouth                                    | 15 (21)          | 35 (49)              | 22 (30)           |
| Problems swallowing liquids                        | 11 (15)          | 40 (56)              | 21 (29)           |
| Problems swallowing pureed food                    | 9 (13)           | 42 (58)              | 21 (29)           |
| Problems swallowing solid foods                    | 13 (18)          | 38 (53)              | 21 (29)           |
| Choking                                            | 10 (14)          | 41 (57)              | 21 (29)           |
| Problems chewing                                   | 18 (25)          | 33 (46)              | 21 (29)           |
| Problems with teeth                                | 12 (17)          | 39 (54)              | 21 (29)           |
| Dry mouth                                          | 24 (33)          | 27 (38)              | 21 (29)           |
| Problems with coughing                             | 11 (15)          | 40 (56)              | 21 (29)           |
| Problems with hoarseness                           | 10 (14)          | 41 (57)              | 21 (29)           |
| Problems with smell                                | 20 (28)          | 31 (43)              | 21 (29)           |
| Problems with sense of taste                       | 17 (24)          | 34 (47)              | 21 (29)           |
| Trouble eating in front of other people            | 16 (22)          | 35 (49)              | 21 (29)           |
| Problems speaking clearly                          | 25 (35)          | 26 (36)              | 21 (29)           |
| Difficulties raising the arm or moving it sideways | 7 (10)           | 44 (61)              | 21 (29)           |
| Pain in shoulders                                  | 14 (19)          | 37 (52)              | 21 (29)           |

**Table S7.** Treatment specific HRQoL issues after surgery of the breast.

| N = 25                | Present<br>N (%) | Not present<br>N (%) | Missings<br>N (%) |
|-----------------------|------------------|----------------------|-------------------|
| Breast reconstruction | 5 (20)           | 15 (60)              | 5 (20)            |

|                                                    |         |         |        |
|----------------------------------------------------|---------|---------|--------|
| Swollen arm or hand                                | 4 (16)  | 16 (64) | 5 (20) |
| Difficulties raising the arm or moving it sideways | 8 (32)  | 12 (48) | 5 (20) |
| Pain in the area of affected breast                | 7 (28)  | 13 (52) | 5 (20) |
| Swelling in the area of affected breast            | 4 (16)  | 16 (64) | 5 (20) |
| Numbness or tingling in arm or shoulder            | 4 (16)  | 16 (64) | 5 (20) |
| Difficulties looking at yourself naked             | 12 (48) | 8 (32)  | 5 (20) |

**Table S8.** Treatment specific HRQoL issues after chemotherapy, radiotherapy and chemoradiation.

|                                                           | Present<br>N (%) | Not present<br>N (%) | Missings<br>N (%) |
|-----------------------------------------------------------|------------------|----------------------|-------------------|
| Chemotherapy (n = 86)                                     |                  |                      |                   |
| Tingling or numbness in hands or feet                     | 37 (43)          | 49 (57)              | 0 (0)             |
| Pain in muscles or joints                                 | 33 (38)          | 53 (62)              | 0 (0)             |
| Food and drink taste different than usual                 | 19 (22)          | 67 (78)              | 0 (0)             |
| Dry mouth                                                 | 29 (34)          | 57 (66)              | 0 (0)             |
| Sensitive mouth                                           | 19 (22)          | 67 (78)              | 0 (0)             |
| Skin problems (e.g. itchy, dry)                           | 35 (41)          | 51 (59)              | 0 (0)             |
| Problems with hair                                        | 29 (34)          | 57 (66)              | 0 (0)             |
| Concerned about your ability to have children             | 13 (15)          | 73 (85)              | 0 (0)             |
| Radiotherapy (n = 426)                                    |                  |                      |                   |
| Skin problems (e.g., itchy, dry)                          | 150 (35)         | 276 (65)             | 0 (0)             |
| Muscle cramps at the site of radiation                    | 95 (22)          | 327 (77)             | 4 (1)             |
| Scars at site of radiation                                | 196 (45)         | 227 (54)             | 3 (1)             |
| Muscle weakness or loss of sensation at site of radiation | 201 (47)         | 223 (53)             | 2 (0)             |
| Dry cough                                                 | 50 (12)          | 372 (87)             | 4 (1)             |
| Irradiated bones that spontaneously broke                 | 9 (2)            | 416 (98)             | 1 (0)             |
| Chemoradiation (n = 98)                                   |                  |                      |                   |
| Tingling or numbness in hands or feet                     | 42 (43)          | 56 (57)              | 0 (0)             |
| Pain in muscles or joints                                 | 39 (40)          | 59 (60)              | 0 (0)             |
| Food and drink taste different than usual                 | 41 (42)          | 57 (58)              | 0 (0)             |
| Dry mouth                                                 | 44 (45)          | 54 (55)              | 0 (0)             |
| Sensitive mouth                                           | 29 (30)          | 69 (70)              | 0 (0)             |
| Skin problems (e.g., itchy, dry)                          | 42 (43)          | 56 (57)              | 0 (0)             |
| Problems with hair                                        | 40 (41)          | 58 (59)              | 0 (0)             |
| Concerned about your ability to have children             | 11 (11)          | 85 (87)              | 2 (2)             |
| Scars at site of radiation                                | 30 (31)          | 65 (66)              | 3 (3)             |
| Muscle weakness or loss of sensation at site of radiation | 43 (44)          | 54 (55)              | 1 (1)             |
| Dry cough                                                 | 18 (18)          | 79 (81)              | 1 (1)             |
| Irradiated bones that spontaneously broke                 | 4 (4)            | 93 (95)              | 1 (1)             |

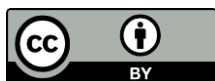

© 2020 by the authors. Licensee MDPI, Basel, Switzerland. This article is an open access article distributed under the terms and conditions of the Creative Commons Attribution (CC BY) license (<http://creativecommons.org/licenses/by/4.0/>).
